# Supplementary material
Source: publisher site journal article supplement (https://www.dovepress.com/article/605582)
Supplement: Supplementary file 1 [file 605582%20Supplementary%20Material.docx]

**Supplement material 1**

**Search strategy:**

**MEDLINE 2026.01.03**

(Pharmacists[MeSH] OR Pharmacies[MeSH] OR "Community Pharmacy Services"[MeSH] OR "Pharmacy Service, Hospital"[MeSH] OR pharmacist*[tiab] OR pharmacy[tiab] OR "clinical pharmacist"[tiab] OR "clinical pharmacy"[tiab])

AND

("Patient Education as Topic"[MeSH] OR Counseling[MeSH] OR "Drug Information Services"[MeSH] OR counsel*[tiab] OR "patient counseling"[tiab] OR "medication counseling"[tiab] OR "medicine counseling"[tiab] OR "drug counseling"[tiab] OR "patient education"[tiab] OR "medication education"[tiab] OR "patient instruction"[tiab] OR "medication instruction"[tiab] OR "drug information"[tiab] OR "medication guidance"[tiab])

AND

("Practice Guidelines as Topic"[MeSH] OR Guideline[pt] OR Consensus[MeSH] OR "Consensus Development Conference"[pt] OR guideline*[tiab] OR "practice guideline"[tiab] OR "clinical guideline"[tiab] OR recommendation*[tiab] OR "best practice"[tiab] OR guidance[tiab] OR standard*[tiab] OR "professional standard"[tiab] OR protocol*[tiab] OR procedure*[tiab] OR workflow*[tiab] OR "work flow"[tiab] OR "working process"[tiab] OR "work process"[tiab] OR algorithm*[tiab] OR flowchart*[tiab] OR "flow chart"[tiab] OR framework*[tiab] OR pathway*[tiab] OR checklist*[tiab] OR "consensus statement"[tiab] OR "position statement"[tiab])

AND

(dispens*[tiab] OR "Prescription Drugs"[MeSH] OR "Drug Prescriptions"[MeSH]

OR prescription drug*[tiab] OR prescription medicine*[tiab] OR prescribed drug*[tiab] OR prescribed medicine*[tiab] OR "prescribed medication*”[tiab])

Filters applied: in the last 10 years.

**369**

**Embase 2026.01.03**

('pharmacist'/exp OR 'pharmacy'/exp OR 'community pharmacy service'/exp OR 'hospital pharmacy service'/exp OR pharmacist*:ti,ab OR pharmacy:ti,ab OR 'clinical pharmacist':ti,ab OR 'clinical pharmacy':ti,ab)

AND

('patient education'/exp OR 'counseling'/exp OR 'drug information service'/exp OR counsel*:ti,ab OR 'patient counseling':ti,ab OR 'medication counseling':ti,ab OR 'medicine counseling':ti,ab OR 'drug counseling':ti,ab OR 'patient education':ti,ab OR 'medication education':ti,ab OR 'patient instruction':ti,ab OR 'medication instruction':ti,ab OR 'drug information':ti,ab OR 'medication guidance':ti,ab)

AND

('practice guideline'/exp OR guideline:it OR 'consensus'/exp OR 'consensus development conference'/it OR guideline*:ti,ab OR 'practice guideline':ti,ab OR 'clinical guideline':ti,ab OR recommendation*:ti,ab OR 'best practice':ti,ab OR guidance:ti,ab OR standard*:ti,ab OR 'professional standard':ti,ab OR protocol*:ti,ab OR procedure*:ti,ab OR workflow*:ti,ab OR 'work flow':ti,ab OR 'working process':ti,ab OR 'work process':ti,ab OR algorithm*:ti,ab OR flowchart*:ti,ab OR 'flow chart':ti,ab OR framework*:ti,ab OR pathway*:ti,ab OR checklist*:ti,ab OR 'consensus statement':ti,ab OR 'position statement':ti,ab)

AND

('drug dispensing'/exp OR dispens*:ti,ab OR 'prescription drug'/exp OR 'drug prescription'/exp OR prescription drug*:ti,ab OR prescription medicine*:ti,ab OR prescribed drug*:ti,ab OR prescribed medicine*:ti,ab OR 'prescribed medication*':ti,ab)

Filters applied: in the last 10 years.
**382**

**Cochrane Library 2026.01.03**

([mh "Pharmacists"]
OR [mh "Pharmacies"]
OR [mh "Community Pharmacy Services"]
OR [mh "Pharmacy Service, Hospital"]
OR pharmacist*:ti,ab,kw
OR pharmacy:ti,ab,kw
OR "clinical pharmacy":ti,ab,kw
OR "clinical pharmacist":ti,ab,kw)

AND

([mh "Patient Education as Topic"]
OR [mh "Counseling"]
OR [mh "Drug Information Services"]
OR counsel*:ti,ab,kw
OR patient NEXT counseling:ti,ab,kw
OR medication NEXT counseling:ti,ab,kw
OR medicine NEXT counseling:ti,ab,kw
OR drug NEXT counseling:ti,ab,kw
OR patient NEXT education:ti,ab,kw
OR medication NEXT education:ti,ab,kw
OR patient NEXT instruction:ti,ab,kw
OR medication NEXT instruction:ti,ab,kw
OR drug NEXT information:ti,ab,kw
OR medication NEXT guidance:ti,ab,kw)

AND

([mh "Practice Guidelines as Topic"]
OR [mh "Consensus"]
OR guideline*:ti,ab,kw
OR practice NEXT guideline*:ti,ab,kw
OR clinical NEXT guideline*:ti,ab,kw
OR recommendation*:ti,ab,kw
OR best NEXT practice:ti,ab,kw
OR guidance:ti,ab,kw
OR standard*:ti,ab,kw
OR professional NEXT standard*:ti,ab,kw
OR protocol*:ti,ab,kw
OR procedure*:ti,ab,kw
OR workflow*:ti,ab,kw
OR work NEXT flow:ti,ab,kw
OR working NEXT process:ti,ab,kw
OR work NEXT process:ti,ab,kw
OR algorithm*:ti,ab,kw
OR flow NEXT chart*:ti,ab,kw
OR framework*:ti,ab,kw
OR pathway*:ti,ab,kw
OR checklist*:ti,ab,kw
OR consensus NEXT statement:ti,ab,kw
OR position NEXT statement:ti,ab,kw)

AND

(dispens*:ti,ab,kw
OR [mh "Prescription Drugs"]
OR [mh "Drug Prescriptions"]
OR prescription NEXT drug*:ti,ab,kw
OR prescription NEXT medicine*:ti,ab,kw
OR prescribed NEXT drug*:ti,ab,kw
OR prescribed NEXT medicine*:ti,ab,kw
OR prescribed NEXT medication*:ti,ab,kw)

Filters applied: in the last 10 years.
**34**

**Google Scholar/ Google 2026.01.03**

Keywords related to pharmacist, medication counselling, guideline, and prescription were used.

First 200 results sorted by relevance were screened

| **Supplementary Material 2.** Extracted intervention components of prescription medication counselling across included sources (TIDieR-informed framework) | | | | |
| --- | --- | --- | --- | --- |
| **Study ( year)** | **Rationale / Goal** | **Intervention materials** | **Core intervention procedures** | **Tailoring criteria** |
| Community pharmacist counselling practices in the Bisha health directorate, Saudi Arabia–simulated patient visits (2020)³ | Describe counselling elements delivered during prescription dispensing | Standardised simulated scenarios; verbal counselling checklist | -Identify medicine recipient -Check prior medicine use -Review current medicines -Check allergy history -State medicine name and dose -Explain administration and treatment duration -Explain precautions and adverse reactions -Assess prescription scenario for allergy or interaction risk -Determine need for referral or alternative action | No tailoring rules described |
| Development and content validation of an instrument to support pharmaceutical counselling for dispensing of prescribed medicines (2020)¹⁷ | Develop and validate a structured counselling instrument | Structured counselling instrument (validated); expert consensus rounds | -Identify patient and confirm intended medicine recipient -Assess whether medicine is new or ongoing and review prescription completeness -Assess indication appropriateness, dose and regimen, contraindications, precautions, drug–drug and drug–disease interactions, allergy history, and potential medication-related problems -Explain medicine name, dose and schedule, administration instructions, treatment duration, storage conditions, key precautions, adverse effects, and actions in case of problems -Verify patient understanding, invite questions, provide final advice, and close counselling encounter | -Adjust initial questioning according to new or ongoing therapy status -Prioritize safety checks based on patient characteristics and prescription risk profile -Adjust depth of information according to patient understanding and medicine complexity -Emphasize understanding verification when risk or complexity is high |
| Dispensing Practice Guidelines (2019)¹⁸ | Elicit key information, identify/resolve MRPs, and ensure safe/effective medicine use | CMI leaflets; CALs; PSA Self Care Fact Cards; delivery aids/therapeutic devices/dose administration aids | -Confirm identity using three or more identifiers -Perform final accuracy check to ensure correct medicine and correct patient -Provide key medicine information including indication, directions, expected outcomes, adverse reactions and management, and storage -Verify patient understanding -Demonstrate correct use of delivery devices or administration aids when relevant -Document professional accountability in dispensing records | -New medicine Change in strength or regimen -Children -Older adults -Polypharmacy -Patients with visual, auditory, cognitive, or cultural needs -Medicines with narrow therapeutic index -Controlled medicines -Presence of actual or potential medication-related problems |
| Effectiveness of a protocolized dispensing service in community pharmacy for improving patient medication knowledge (2016)¹⁹ | Improve patient medication knowledge via protocolized dispensing service | Protocolized counselling protocol; verbal counselling content | -Identify patient or caregiver -Confirm intended medicine recipient -Determine whether medicine is new or ongoing -Provide information on therapeutic objective, dose, schedule, administration, duration, and storage -Explain adverse reactions, precautions, contraindications, and interactions -Explain actions in case of problems -Verify patient understanding -Invite patient questions | -Adapt initial questioning according to new or ongoing therapy status -Emphasize information elements based on identified knowledge gaps -Adjust safety emphasis according to medicine risk profile -Reinforce understanding verification when baseline knowledge is low |
| Guide to undertaking person- centred inpatient (ward)  outpatient (clinic) and dispensary- based  pharmacy consultations (2020)²⁰ | Ensure understanding of discharge medicines (changes/additions/discontinuations) | Discharge consultation guide; patient leaflets; medicine labels | -Explain purpose of discharge medicines discussion -Invite patient questions before providing information -Assess knowledge of existing and newly prescribed medicines -Discuss medicines according to patient-selected priorities -Reinforce key instructions, safety information, and support contacts | -Adapt content and timing according to patient readiness and willingness to engage -If patient declines discussion, provide written information and contact details |
| Medicines adherence:  involving patients in  decisions about prescribed  medicines and supporting  adherence (2009)²¹ | Support informed choice and reduce non-adherence | Verbal counselling; written information; lists; adherence questions | -Ask patients what they know and understand about prescribed medicines -Clarify misconceptions before and after prescribing -Provide clear information on indication, benefits, risks, adverse effects, administration, missed doses, and future supply -Check patient understanding and address remaining concerns -Assess adherence in a non-judgemental manner -Explore reasons for missed doses or altered use | -Adapt communication style and information format according to literacy, language, sensory, or cognitive status -Individualize information to patient preferences, condition, and circumstances -Repeat or reinforce information for long-term conditions or polypharmacy -Tailor adherence interventions to perceptual or practical barriers |
| Patient medication counselling in community pharmacy: evaluation of the quality and content (2022) ²² | Assess perceived content and quality of medication counselling | USP-MCBG questionnaire (35 items) | -Assess allergies, current medicines, and age -Respond with empathy -Obtain medical, family, and social history -Assess baseline understanding -Discuss adverse effects and drug interactions -Explain missed-dose management -Discuss storage requirements and onset of action -Verify patient understanding -Probe for additional information -Communicate clearly and demonstrate appropriate nonverbal behavior | -Emphasize high-risk groups including children, older adults, polypharmacy, and special needs -Differentiate counselling for new versus refill prescriptions |
| Patient-centred consultations in a dispensary setting: a learning journey (2017)²³ | Tailor counselling to patient readiness; improve engagement and safety | Counselling flow chart; safety checklist; coaching framework (4Es); leaflets/helpline info | -Assess patient willingness to discuss medicines -Classify consultation level -Confirm medicine recipient and allergy status -Provide key safety messages -Direct patient to written information and helpline contact -Invite questions and explore concerns -Provide tailored medicine education -Support patient participation in decisions -Enable agreed self-management actions | -Adjust counselling depth according to patient category and willingness to engage -Limit counselling to safety essentials when full discussion is declined -Adapt content based on patient questions and concerns using a structured coaching framework -Relocate consultation when privacy is required |
| Patient–provider communication about medication use at the community pharmacy counte (2016)²⁴ | Evaluate whether recommended counselling elements are delivered | Video-recorded encounters; verbal counselling | -Explain dosage instructions and duration of treatment -Explain conditions for use -Provide cost or reimbursement information when relevant -State medicine name and basic dosage for repeat prescriptions -Check whether prior explanation was received -Assess patient understanding -Invite patient questions -Distinguish first versus repeat prescriptions | -Provide more extensive information for first prescriptions -Limit counselling to basic elements for repeat prescriptions -Adjust counselling content based on prescription status at the start of the encounter -Engagement predominantly reactive rather than proactive -Understanding checks inconsistently performed |
| Patients’ knowledge of new medicines after discharge from hospital: What are the effects of hospital-based discharge counseling and community-based medicines use reviews (MURs)?  (2017)²⁵ | Improve knowledge of newly prescribed discharge medicines | Verbal discharge counselling; discharge letter/new-medicine identification | -Identify newly started medicines during admission -Distinguish new medicines from continued therapy -Focus counselling on newly prescribed medicines at discharge -Explain purpose, administration, dosing schedule, and duration -Explain monitoring requirements -Explain adverse effects, missed-dose management, and interactions -Verify patient understanding -Assess knowledge through follow-up questioning | -Prioritize counselling for newly prescribed medicines -Provide structured explanation for each new medicine -Emphasize duration and monitoring for medicines requiring follow-up -Prioritize safety information for high-risk medicines -Reinforce verification when multiple new medicines are prescribed |
| Policy and Procedure of Preparation and  Dispensing of Medications (2025)²⁶ | Ensure correct use, compliance, and safety | Verbal counselling; label instructions; referral pathway | -Provide clear instructions and advice at dispensing -Verify patient understanding of instructions and advice -Inform patients about storage, transportation, and specific usage requirements -Advise patients to report adverse drug reactions -Inform patients about potential drug–food interactions -Refer complex cases to a specialist pharmacist when required | -Provide counselling when necessary based on patient needs and medicine characteristics -Adapt verification according to patient communication ability and language familiarity -Emphasize counselling for medicines requiring special storage or handling -Emphasize safety information for medicines with known adverse reaction or interaction risks -Refer cases based on medication complexity or patient-specific needs |
| PSI Guidelines to support Medicines  Therapy Review, Counselling,  and Prescription Extension (2024)²⁷ | Enable safe use, informed decisions, and active participation in care | Leaflets/labels; visual aids; digital tools when appropriate | -Offer counselling at each dispensing episode -Explain medicine purpose, benefits, risks, and precautions -Address adherence, missed doses, and device use -Provide information on monitoring, storage, and disposal -Record professional advice and counselling interventions -Document prescription extension decisions and rationale | -Adapt communication using plain language, large print, symbols, different languages, or digital tools according to individual needs -Adjust documentation detail according to type of service and clinical decision |
| Standards of Practice: General Pharmacy Practice (2025)²⁸ | Ensure safe/effective use and optimal outcomes | Verbal counselling; supplemental written info; device education | -Counsel on all new or changed medicines -Provide structured information including medicine name, purpose, directions, interactions, expected response, adverse effects, monitoring, refill information, storage, safety, expiry, and disposal -Confirm understanding of the care plan -Discuss adherence tools and options when appropriate -Monitor adherence, therapeutic response, and adverse effects | -Adapt counselling to patient level of understanding, preferences, and communication needs -Tailor information depth according to patient needs, medication risk, and complexity -Adapt confirmation according to communication ability and decision-making capacity -Tailor adherence support based on patient-specific barriers and preferences -Adjust monitoring intensity according to patient risk and therapy complexity |
| The Patient Care Process for Delivering  Comprehensive Medication Management (2018)²⁹ | Standardise medication counselling by verifying appropriateness/safety/effectiveness/feasibility | Structured interview; medication list; EHR; checklists | -Review all prescribed, nonprescription, and supplementary medicines -Confirm dose, frequency, and duration with the patient -Assess patient understanding of indication, expected effects, and adverse effects -Explore patient medication experience -Provide individualized education on administration, timing, and precautions -Ask patient to restate instructions to verify understanding | -Review medications one by one and assess adherence aids for patients with polypharmacy -Use simplified language and repeated confirmation for older adults or patients with low health literacy -Align counselling with the patient’s daily routine when schedules are complex -Perform confirmation with caregiver involvement for patients with cognitive impairment |
